# Supplementary material for: High Incidence of SARS-CoV-2 Variant of Concern Breakthrough Infections Despite Residual Humoral and Cellular Immunity Induced by BNT162b2 Vaccination in Healthcare Workers: A Long-Term Follow-Up Study in Belgium
Source: MDPI journal article supplement (doi:10.3390/v14061257), 2022-06-09
Supplement: s1 [file s1]

## Supplementary Materials

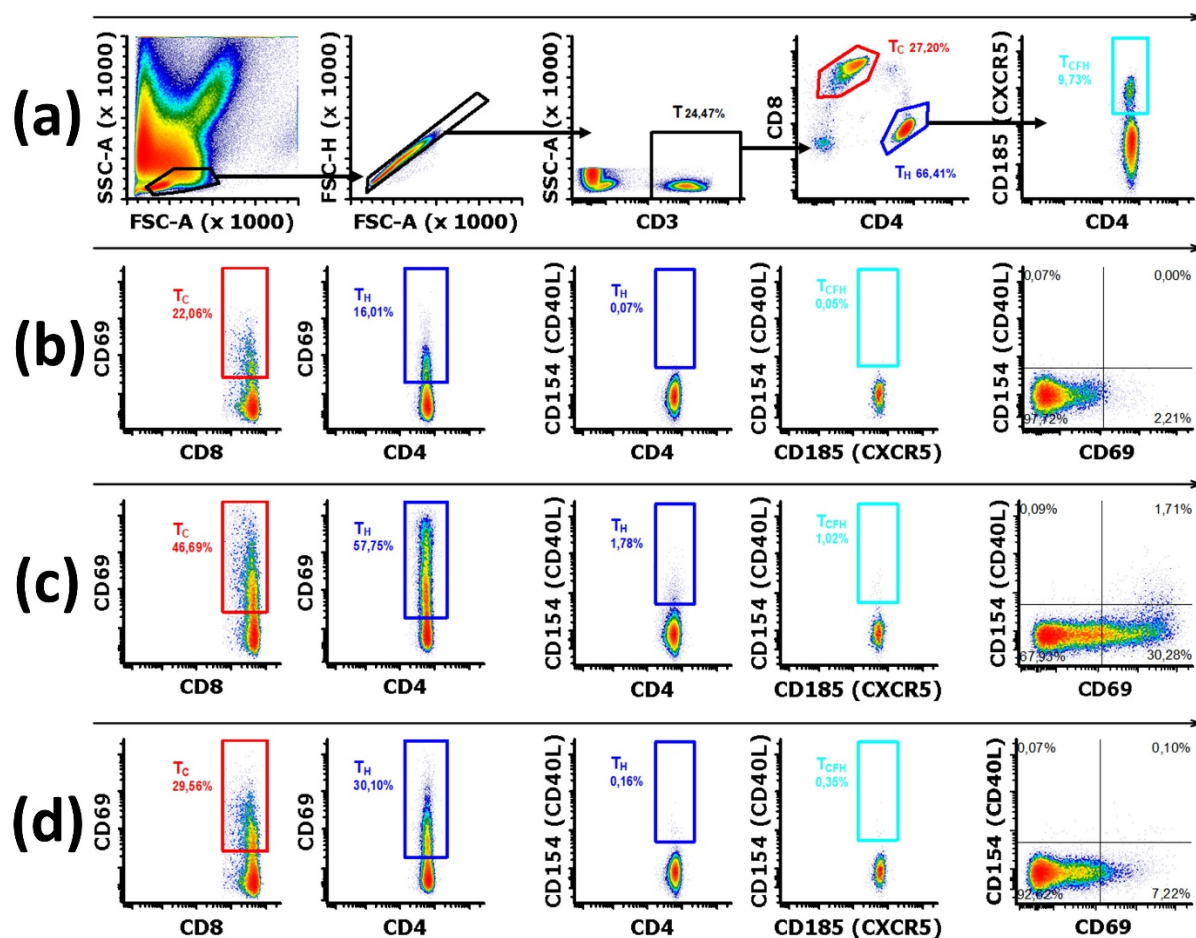

**Figure S1.** Flowcytometric T cell profiling. (a) Gating strategy used to define the different T cell subsets ( $T_H$ ,  $T_C$  and  $T_{CFH}$ ) and to assess T cell activity using both CD69 and CD40L membrane markers following stimulation of immune cells in whole blood. (b–d) A representative example of each test condition from whole blood of a participant at mid-term follow-up. From left to right: dot plots showing membrane expression of CD69 within  $T_C$  and  $T_H$  cells, CD40L expression within  $T_H$  and  $T_{CFH}$  cells and combined CD69/CD40L expression within  $T_H$  in unstimulated (b), mitogen stimulated (c) and SARS-CoV-2 antigen stimulated cells of a representative study participant (d).

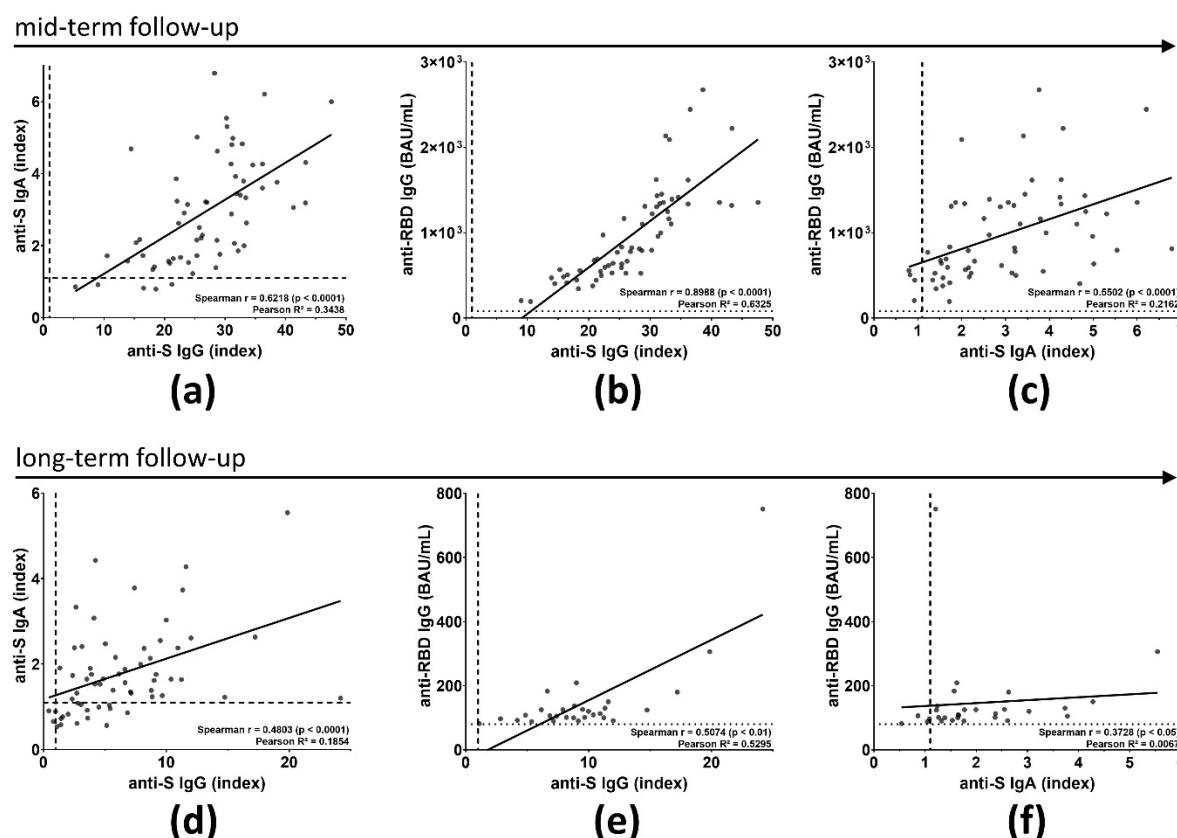

**Figure S2.** Correlation plots of SARS-CoV-2 specific serology measured at mid- and long-term follow-up. (a–c) Correlation plots at mid-term follow-up: (a) anti-S IgG vs anti-S IgA, (b) anti-S IgG vs anti-RBD IgG and (c) anti-S IgA vs anti-RBD IgG. Dashed lines = assay-specific cut-offs, dotted lines = assay-specific LOD. (d–f) Correlation plots at long-term follow-up: (d) anti-S IgG vs anti-S IgA, (e) anti-S IgG vs anti-RBD IgG and (f) anti-S IgA vs anti-RBD IgG. Dashed lines = assay-specific cut-offs, dotted lines = assay-specific LOD. Abbreviations: S = spike, RBD = receptor-binding domain, % IH = percentage inhibition, ACE2 = angiotensin converting enzyme 2, qAC50 = ‘qualified AC50’: 50 % activity against SARS-CoV-2 variant, VoC = variant of concern, pre = baseline sampling moment before vaccination, 3m = 3 months after baseline, 10m = 10 months after baseline, IQR = interquartile range, LOD = limit of detection.

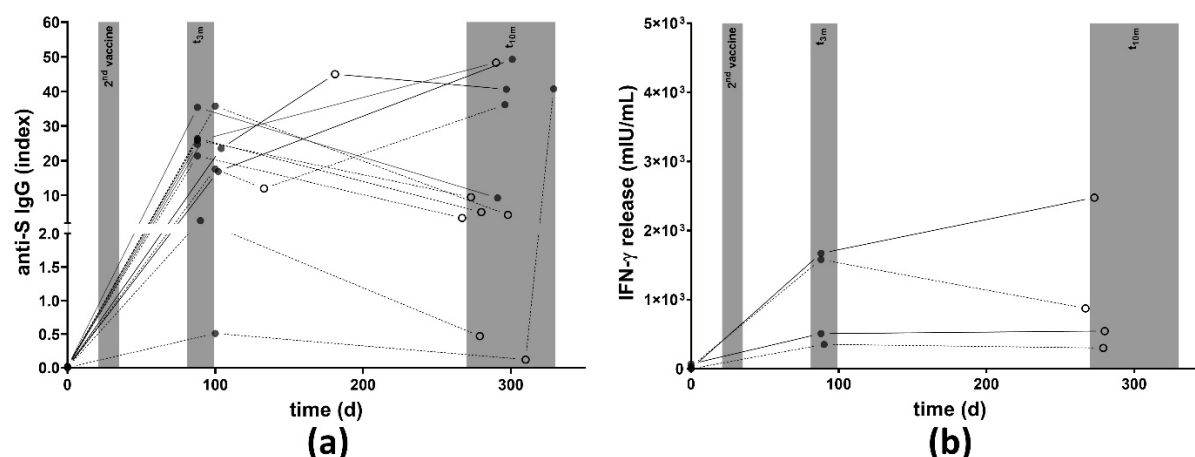

**Figure S3.** Evolution of SARS-CoV-2 specific humoral and cellular immunity in subjects with reported BTI ( $n = 11$  and 4). (a) Anti-S IgG titers. (b) T cell mediated IFN- $\gamma$  release. Open circles titers =  $t_{BTI}$  sampling moment (if present). Full lines = subjects with rising anti-S IgG antibodies or specific IFN- $\gamma$  release at  $t_{BTI}$  compared to  $t_{3m}$ . Dashed lines = subjects with decreasing anti-S IgG antibodies or specific IFN- $\gamma$  release at  $t_{BTI}$  compared to  $t_{3m}$ . Abbreviations: RBD = receptor-binding domain,

IFN- $\gamma$  = interferon- $\gamma$ , BTI = breakthrough infection, SD = standard deviation, 3m = 3 months after baseline, 10m = 10 months after baseline.

**Table S1.** Correlation between RBD specific B cells and humoral parameters measured after BNT162b2 vaccination.

| Parameter vs Parameter                | t <sub>3m</sub>               |                        | t <sub>10m</sub>              |                        |
|---------------------------------------|-------------------------------|------------------------|-------------------------------|------------------------|
|                                       | Spearman r ( <i>p</i> -Value) | Pearson R <sup>2</sup> | Spearman r ( <i>p</i> -Value) | Pearson R <sup>2</sup> |
| RBD specific B cells vs anti-S IgG    | 0.9333 ( <i>p</i> = 0.0007)   | 0.4425                 | 0.2183 ( <i>p</i> = 0.4504)   | 0.0163                 |
| RBD specific B cells vs anti-RBD IgG  | 0.9000 ( <i>p</i> = 0.002)    | 0.6326                 | −0.1094 ( <i>p</i> = 0.7655)  | 0.0060                 |
| RBD specific B cells vs RBD-ACE2 % IH | 0.8833 ( <i>p</i> = 0.0031)   | 0.3202                 | 0.2448 ( <i>p</i> = 0.3961)   | 0.0495                 |
| RBD specific B cells vs qAC50 D614G   | 0.7333 ( <i>p</i> = 0.0311)   | 0.1231                 | −0.0826 ( <i>p</i> = 0.7969)  | 0.0027                 |
| RBD specific B cells vs qAC50 delta   | 0.5988 ( <i>p</i> = 0.125)    | 0.0611                 | 0.0952 ( <i>p</i> = 0.8401)   | 0.0151                 |

Abbreviations: S = spike, RBD = receptor-binding domain, ACE2 = angiotensin converting enzyme 2, % IH = percentage inhibition, qAC50 = ‘qualified AC50’: 50 % activity against SARS-CoV-2 variant, 3m = 3 months after baseline, 10m = 10 months after baseline.

**Table S2.** Demographic and sequencing information of subjects with reported BTI (n = 13).

| Subject ID | Age (Years) | Sex (F/M) | t <sub>BTI</sub> (Days) * | VoC   | GISAID ID        |
|------------|-------------|-----------|---------------------------|-------|------------------|
| 074        | 38          | F         | 44                        | Alpha | EPI_ISL_7979782  |
| 023        | 34          | M         | 47                        | Alpha | EPI_ISL_11998002 |
| 027        | 38          | F         | 103                       | Alpha | TBA              |
| 024        | 26          | M         | 151                       | Delta | EPI_ISL_5425267  |
| 067        | 34          | F         | 212                       | Delta | In progress      |
| 073        | 35          | F         | 237                       | NA    | NA               |
| 075        | 36          | F         | 243                       | NA    | NA               |
| 061        | 38          | F         | 249                       | Delta | TBA              |
| 068        | 37          | F         | 250                       | Delta | TBA              |
| 041        | 58          | M         | 260                       | Delta | TBA              |
| 052        | 53          | F         | 264                       | Delta | TBA              |
| 007        | 45          | M         | 268                       | Delta | TBA              |
| 005        | 56          | M         | 280                       | Delta | TBA              |

\* = number of days after receiving the second BNT162b2 vaccine. Abbreviations: ID = coded identity, F = female, M = male, BTI = breakthrough infection, VoC = variant of concern, NA = not available, TBA = to be added.

**Table S3.** Disease severity and symptoms of subjects with reported BTI (n = 13).

| Subject ID | Severity *   | Fever | Cough | Sore Throat | Muscle Pain | Malaise | Dyspnea | Sum |
|------------|--------------|-------|-------|-------------|-------------|---------|---------|-----|
| 074        | Mild         | 1     | 7     | 2           | 1           | 3       | 4       | 18  |
| 023        | Asymptomatic | 1     | 2     | 1           | 1           | 1       | 1       | 7   |
| 027        | Mild         | 1     | 3     | 1           | 1           | 1       | 1       | 8   |
| 024        | Mild         | 1     | 2     | 2           | 1           | 4       | 1       | 11  |
| 067        | Asymptomatic | 1     | 1     | 1           | 1           | 1       | 1       | 6   |
| 073        | Mild         | 4     | 3     | 1           | 1           | 4       | 1       | 14  |
| 075        | Mild         | 1     | 3     | 1           | 4           | 4       | 2       | 15  |
| 061        | Mild         | 7     | 1     | 5           | 7           | 7       | 1       | 28  |
| 068        | Mild         | 4     | 1     | 1           | 1           | 5       | 1       | 13  |
| 041        | Mild         | 2     | 2     | 1           | 4           | 4       | 1       | 14  |
| 052        | Asymptomatic | 1     | 2     | 1           | 1           | 1       | 1       | 7   |
| 007        | Mild         | 3     | 2     | 1           | 4           | 6       | 1       | 17  |

|     |      |   |   |   |   |   |   |    |
|-----|------|---|---|---|---|---|---|----|
| 005 | Mild | 4 | 4 | 1 | 3 | 4 | 1 | 17 |
|-----|------|---|---|---|---|---|---|----|

Symptoms were graded using a scale from 1-10 with 1 = not present and 10 = severe impact on daily life. \* = WHO COVID-19 severity score. Abbreviations: ID = coded identity.

DEELNEMER ID:

DATUM:

Interne referentie AZ Groeninge:  
(voorbehouden voor onderzoeker AZ Groeninge)

|             |                                                                                               |
|-------------|-----------------------------------------------------------------------------------------------|
| COV-VAX-AZG | Monitoring ernst van ziekte, herstel en epidemiologie bij deelnemers met positieve COVID test |
|-------------|-----------------------------------------------------------------------------------------------|

Beste,

Dank voor uw deelname aan de COV-VAX-AZG studie waarbij de vaccin-geïnduceerde immuunrespons tegen het SARS-CoV-2 virus wordt bestudeerd.

U liet zich eerder testen voor infectie met SARS-CoV-2 met positief testresultaat. Mogen wij a.u.b. vragen om bijkomend onderstaande vragenlijst in te vullen en terug te bezorgen aan [REDACTED]. Uw gegevens worden geanonimiseerd voor de onderzoekers.

| Ziekteverloop                            |                               |
|------------------------------------------|-------------------------------|
| Koorts                                   |                               |
| Hoest                                    |                               |
| Pijnlijke keel                           |                               |
| Spierpijn                                |                               |
| Zich algemeen slecht voelen              |                               |
| Kortademig                               |                               |
| Werd bij u longontsteking vastgesteld?   |                               |
| Herstel                                  |                               |
| Duur van ziekte (# dagen)                |                               |
| Werkverlet (# dagen)                     |                               |
| Ziekenhuisopname (# dagen)               |                               |
| Opname op intensieve zorgen (# dagen)    |                               |
| Medicatie (# dagen)                      |                               |
| Epidemiologie                            |                               |
| Andere gezinsleden ziek (COVID)?         | – indien ja, aantal personen: |
| Collega's binnen uw dienst ziek (COVID)? | – indien ja, aantal personen: |
| Werkte u met COVID patiënten binnen AZG? |                               |

DEELNEMER ID:

DATUM:

WHO severity scoring:

(voorbehouden voor onderzoeker AZ Groeninge)

**Methods S1.** Template of the in-house developed questionnaire for study participants with breakthrough infection. This questionnaire is in Dutch.
